# Supplementary material
Source: PubMed Central journal article supplement (PMC5103799)
Supplement: aasm.39.12.2113s1.pdf [file aasm.39.12.2113s1.pdf]

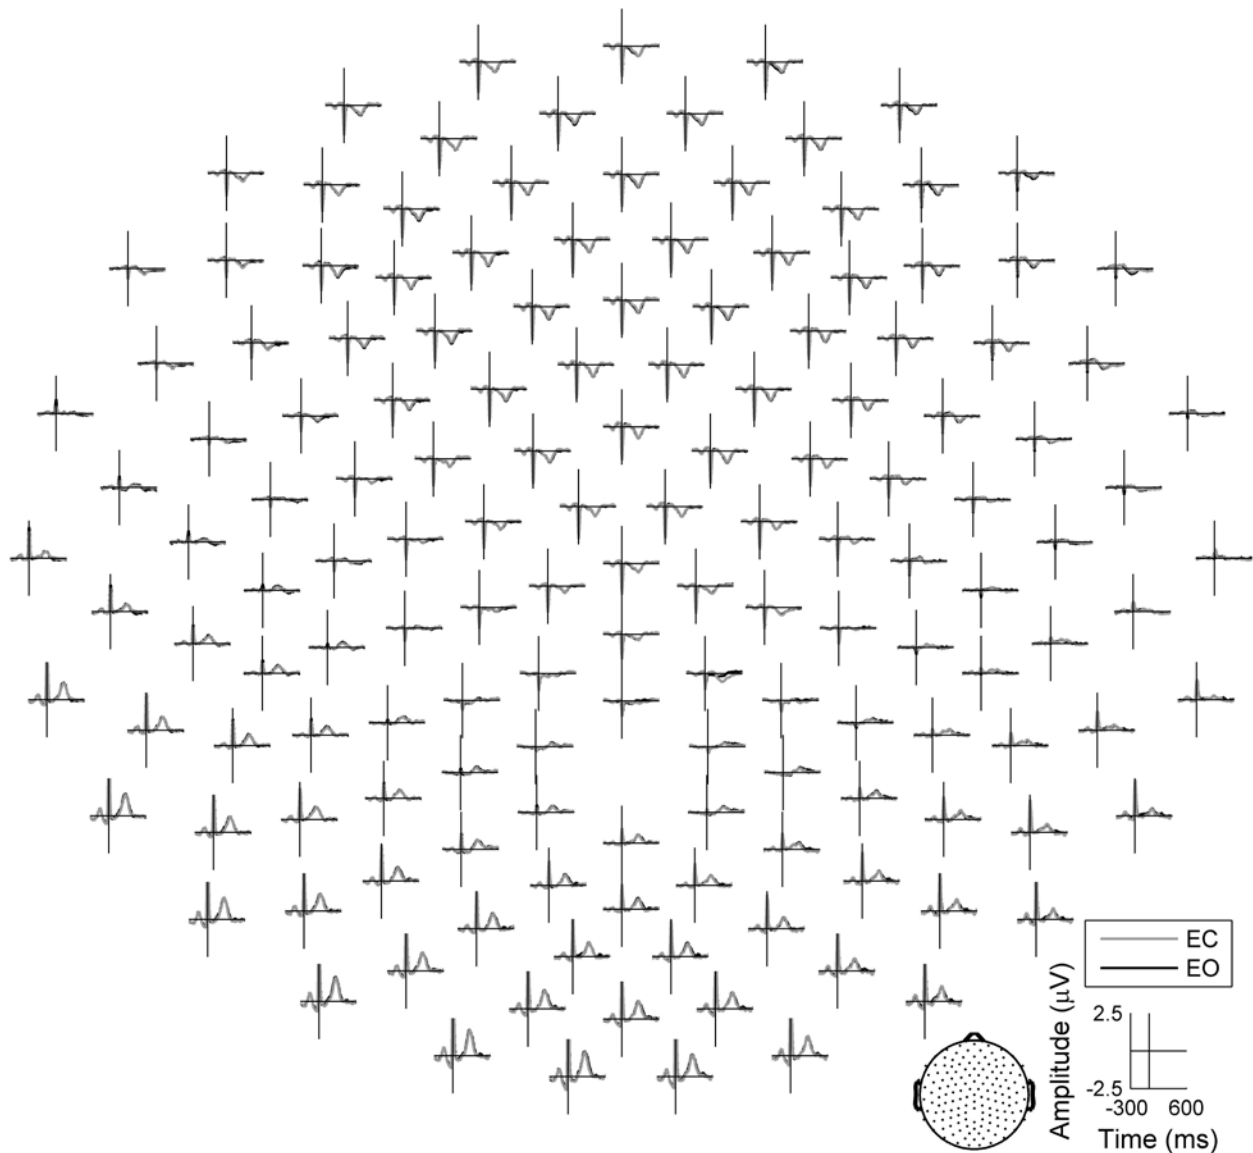

**Figure S1. Grand average resting-state heartbeat-evoked potential (HEP) time courses of 64 participants at each scalp electrode, obtained from the EEG data before artifact removal using independent component analysis (ICA).** The time courses for eyes-closed (EC, gray line) and eyes-open (EO, black line) conditions are displayed separately. Vertical lines indicate the timing of the ECG R-wave peak. The clear ECG-shaped waveforms at all electrodes suggest cardiac field artifacts are prominent across the scalp.

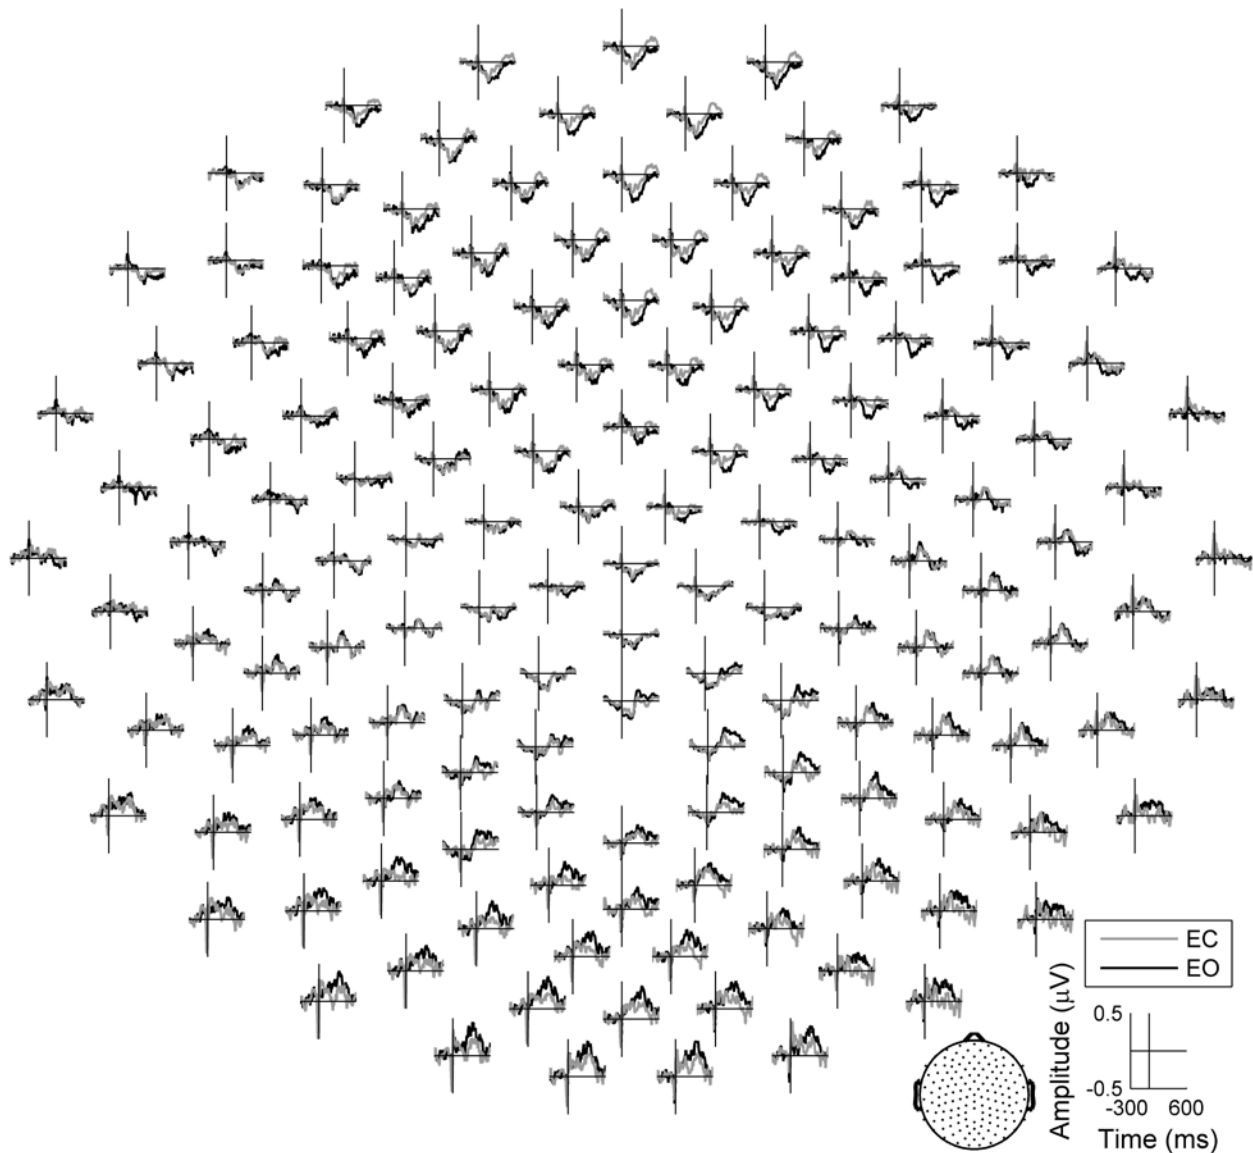

**Figure S2. Grand average resting-state heartbeat-evoked potential (HEP) time courses of 64 participants at each scalp electrode, obtained from the EEG data after artifact removal using independent component analysis (ICA).** The time courses for eyes-closed (EC, gray line) and eyes-open (EO, black line) conditions are displayed separately. Vertical lines indicate the timing of the ECG R-wave peak. After ICA correction, the majority of cardiac field artifacts are removed and clear cortical HEP waveforms can be observed. (Note the different scales used in Figures S1 and S2.)

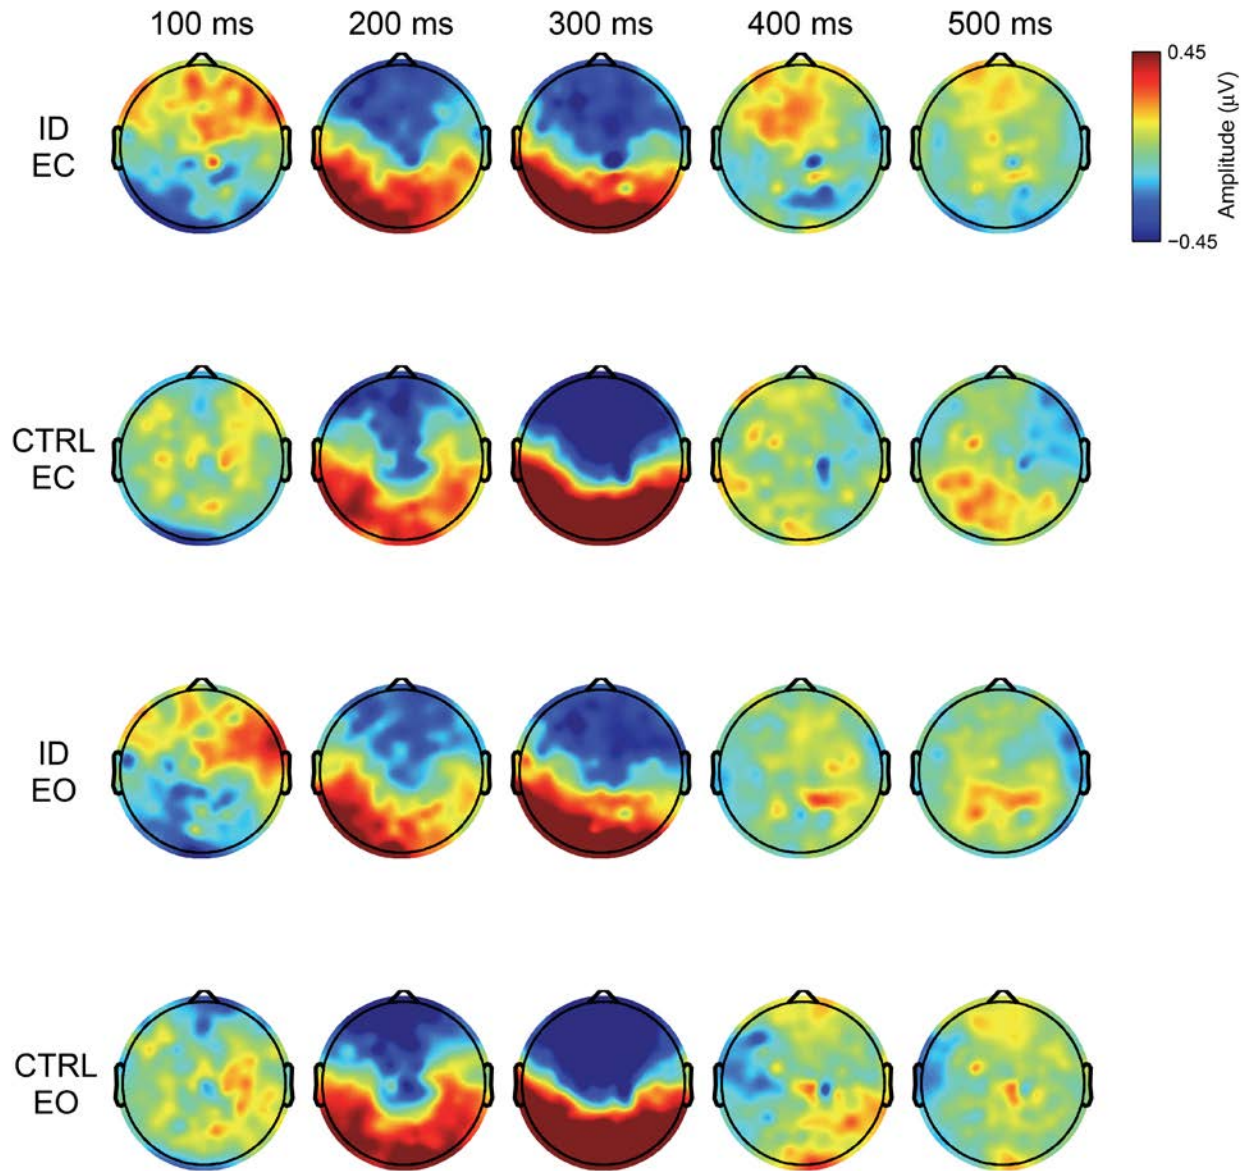

**Figure S3. Topographic snapshots of the resting-state heartbeat-evoked potential (HEP), obtained from the EEG data before artifact removal using independent component analysis (ICA), at every 100 ms after the ECG R-wave.** Each row depicts, respectively, topographic maps of the average amplitude across people with Insomnia Disorder (ID) and controls (CTRL) during the eyes-closed (EC) and eyes-open (EO) conditions.

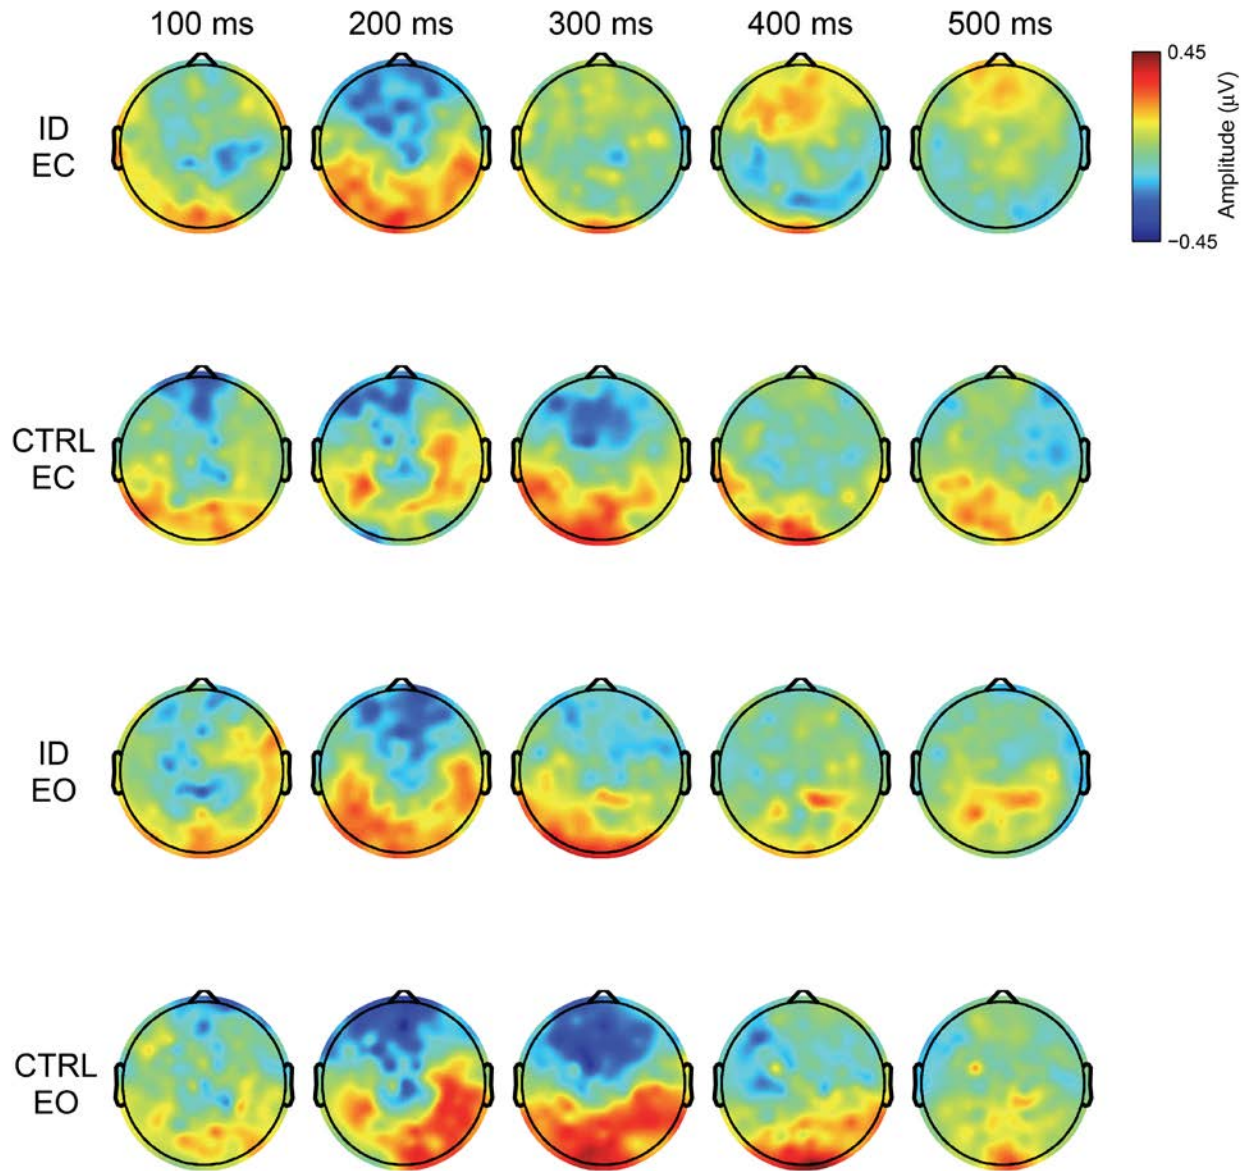

**Figure S4. Topographic snapshots of the resting-state heartbeat-evoked potential (HEP), obtained from the EEG data after artifact removal using independent component analysis (ICA), at every 100 ms after the ECG R-wave. Each row depicts, respectively, topographic maps of the average amplitude across people with Insomnia Disorder (ID) and controls (CTRL) during the eyes-closed (EC) and eyes-open (EO) conditions.**
